# Supplementary material for: Preclinical assessment of the VEGFR inhibitor axitinib as a therapeutic agent for epithelial ovarian cancer
Source: PubMed Central journal article supplement (PMC7078214; doi:10.1038/s41598-020-61871-w), 2020-03-17
Supplement: 41598_2020_61871_MOESM1_ESM.pdf [file 41598_2020_61871_MOESM1_ESM.pdf]

# **Preclinical assessment of the VEGFR inhibitor axitinib as a therapeutic agent for epithelial ovarian cancer**

E Sun Paik<sup>1,\*</sup>, Tae-Hyun Kim<sup>2,\*</sup>, Young Jae Cho<sup>3,\*</sup>, Jiyeon Ryu<sup>3</sup>, Jung-Joo Choi<sup>3</sup>, Yoo-Young Lee<sup>3</sup>, Tae-Joong Kim<sup>3</sup>, Chel-Hun Choi<sup>3</sup>, Woo Young Kim<sup>1</sup>, Jason K. Sa<sup>4</sup>, Jin-Ku Lee<sup>5</sup>, Byoung-Gie Kim<sup>3</sup>, Duk-Soo Bae<sup>3</sup>, Hee Dong Han<sup>6</sup>, Hyung Jun Ahn<sup>7</sup>, Jeong-Won Lee<sup>3,8,9, \*\*</sup>

<sup>1</sup>Department of Obstetrics and Gynecology, Kangbuk Samsung Hospital, Sungkyunkwan University School of Medicine, Seoul, Republic of Korea

<sup>2</sup>Department of Obstetrics and Gynecology, Konyang University Hospital, Daejeon, Republic of Korea

<sup>3</sup>Department of Obstetrics and Gynecology, Samsung Medical Center, Sungkyunkwan University School of Medicine, Seoul, Republic of Korea

<sup>4</sup>Department of Biomedical Sciences, Korea University College of Medicine, Seoul, Republic of Korea

<sup>5</sup>Department of Biochemistry & Molecular Biology, Ajou University, School of Medicine, Suwon, Republic of Korea

<sup>6</sup>Department of Immunology, School of Medicine, Konkuk University, Chungju, Republic of Korea

<sup>7</sup>Center for Theragnosis, Biomedical Research Institute, Korea Institute of Science and Technology, Seoul, Republic of Korea

<sup>8</sup>Institute for Refractory Cancer Research, Samsung Medical Center, Seoul, Republic of Korea.

<sup>9</sup>Samsung Advanced Institute for Health Sciences & Technology, Sungkyunkwan University School of Medicine, Seoul, Republic of Korea

\*These authors contributed equally to this work.

**\*\*Corresponding Author:**

Jeong-Won Lee, MD, PhD

Department of Obstetrics and Gynecology, Samsung Medical Center, Sungkyunkwan University  
School of Medicine, 81 Irwon-ro, Gangnam-gu, Seoul 06351, Korea. Tel.: +82-2-3410-1382; Fax:  
+82-2-3410-0630. E-mail address: garden.lee@samsung.com (J.-W. Lee)

**Supplementary file 1.** Invasion assay-MMP2/MMP9 ELISA in HeyA8 and HeyA8-MDR.

**Supplementary file 2.** Full-length gels and blots for figure 3C (HeyA8).

**Supplementary file 3.** Full-length gels and blots for figure 3D (HeyA8-MDR).
